# Supplementary material
Source: PubMed Central journal article supplement (PMC10777662)
Supplement: NIHMS1946452-supplement-Supplementary_Material.pdf [file NIHMS1946452-supplement-Supplementary_Material.pdf]

## **Supplemental Digital Content 1**

### **Search Strategy**

Databases used: MEDLINE database via Pubmed, Scopus, Web of Science, ERIC, CINAHL, PsycINFO (ProQuest) and Education Research Complete

Pubmed Search: ((general surgery[MeSH Terms]) OR (surgical procedures, operative[MeSH Terms]) OR (video-assisted surgery[MeSH Terms]) OR (surgery, computer-assisted[MeSH Terms]) OR (minimally invasive surgical procedures[MeSH Terms]) OR (surgeons[MeSH Terms]) OR (surgery department, hospital[MeSH Terms]) OR (surgeon[Title]) OR (surgical[Title]) OR (preoperative[Title]) OR (perioperative[Title]) OR (postoperative[Title])) AND ((professional practice gaps[MeSH Terms]) OR (diffusion of innovation[MeSH Terms]) OR (patient reported outcome measures[MeSH Terms]) OR (dissemination[Title]) OR (adoption[Title]) OR (implementation[Title]) OR (behavior change[Title]) OR (feedback[Title]) OR (benchmarked[Title]) OR (mentoring[MeSH Terms]) OR (coaching[Title]) OR (opinion leaders[Title])) Sort by: Best Match Filters: Publication date from 2012/01/01 to 2012/12/31; Humans

The other databases had a variation of controlled language and keywords similar to those listed above with minor modifications based on proprietary thesauruses.

**Supplementary Table - Characteristics of Selected Surgical Practice Change Articles**

| Author, publication year, region | Study setting, design, and topic                                                                                                                                                                                                                                  | Barriers                                                                                                                                                                              | Facilitators                                                                                                                                                                                                                                                                                                                                               | Neutral factors                                                                                                   |
|----------------------------------|-------------------------------------------------------------------------------------------------------------------------------------------------------------------------------------------------------------------------------------------------------------------|---------------------------------------------------------------------------------------------------------------------------------------------------------------------------------------|------------------------------------------------------------------------------------------------------------------------------------------------------------------------------------------------------------------------------------------------------------------------------------------------------------------------------------------------------------|-------------------------------------------------------------------------------------------------------------------|
| Abdelsattar, 2017<br>USA         | <ul style="list-style-type: none"> <li>Regional/national</li> <li>Retrospective cohort</li> <li>Variation in adoption of video-assisted thoracoscopic lobectomy and outcomes</li> </ul>                                                                           | <ul style="list-style-type: none"> <li>Limited personnel and expertise</li> <li>Surgeons' personal preference contrasting with change</li> </ul>                                      | -                                                                                                                                                                                                                                                                                                                                                          | -                                                                                                                 |
| Abrishami, 2014<br>Europe        | <ul style="list-style-type: none"> <li>Regional/national</li> <li>Qualitative</li> <li>Adoption dynamics for da Vinci robot</li> </ul>                                                                                                                            | -                                                                                                                                                                                     | <ul style="list-style-type: none"> <li>Representation as innovative</li> <li>Surgeon benefits (e.g., improved ergonomics, achieving scientific excellence)</li> <li>Outperforming competition</li> <li>Accessibility and reduced financial risks</li> <li>Prioritization of patients' choices and the public's expectations</li> </ul>                     | -                                                                                                                 |
| Aiken, 2013<br>Europe            | <ul style="list-style-type: none"> <li>Regional/national</li> <li>Survey</li> <li>Usage of antibiotic prophylaxis in elective inguinal hernia repair with mesh</li> </ul>                                                                                         | -                                                                                                                                                                                     | <ul style="list-style-type: none"> <li>Guidelines</li> <li>Belief that practice was more effective</li> </ul>                                                                                                                                                                                                                                              | -                                                                                                                 |
| Alam, 2015<br>Europe             | <ul style="list-style-type: none"> <li>Hospital(s), nonspecific*</li> <li>Retrospective cohort</li> <li>Diffusion of laparoscopic bariatric surgery</li> </ul>                                                                                                    | -                                                                                                                                                                                     | <ul style="list-style-type: none"> <li>Specific population characteristics (e.g., higher socioeconomic status)</li> </ul>                                                                                                                                                                                                                                  | -                                                                                                                 |
| Ament, 2017<br>Europe            | <ul style="list-style-type: none"> <li>Academic and community hospitals</li> <li>Qualitative</li> <li>Sustainability of Enhanced Recovery after Surgery (program for colonic surgery and short stay program from breast cancer surgery)</li> </ul>                | -                                                                                                                                                                                     | <ul style="list-style-type: none"> <li>Opportunities for hospital-specific adaptation of program</li> <li>Cost-effectiveness</li> <li>Low staff turnover</li> <li>Effective communication</li> <li>Patient satisfaction, inter-facility networking, program audits with external policies and incentives</li> </ul>                                        | -                                                                                                                 |
| Ament, 2014<br>Europe            | <ul style="list-style-type: none"> <li>Hospital(s), nonspecific*</li> <li>Qualitative</li> <li>Hospital-specific strategies to maintain or improve Enhanced Recovery after colon and breast cancer surgery</li> </ul>                                             | -                                                                                                                                                                                     | <ul style="list-style-type: none"> <li>Internal audit and feedback of outcomes</li> <li>Administrative reminders</li> <li>Educational meetings</li> <li>Physical environment conducive to implementation</li> <li>Effective care process coordination</li> <li>Task delegation and defined staff roles</li> </ul>                                          | -                                                                                                                 |
| Apramian, 2015<br>Canada         | <ul style="list-style-type: none"> <li>Academic center(s)</li> <li>Qualitative</li> <li>Decision-making and influence by others regarding adopting variations on surgical procedures</li> </ul>                                                                   | <ul style="list-style-type: none"> <li>Complexity of conducting surgical clinical trials (e.g., resources, required skillset)</li> </ul>                                              | <ul style="list-style-type: none"> <li>Seeking professional improvement</li> <li>Easily reproducible</li> <li>Positive impact on surgeon quality of life</li> <li>Followed principles of surgery (accepted rules of conduct)</li> <li>Story sharing</li> <li>Trust or logic is demonstrated</li> <li>Spreading variation or the logic behind it</li> </ul> | <ul style="list-style-type: none"> <li>Reputational risk</li> <li>Logistics</li> <li>Career trajectory</li> </ul> |
| Arakawa, 2016<br>Asia            | <ul style="list-style-type: none"> <li>Academic and community hospitals</li> <li>Survey</li> <li>Implementation of a cooperative program between regional cardiology and cardiac surgery facilities for post-acute management of myocardial infarction</li> </ul> | <ul style="list-style-type: none"> <li>Poorly developed communication methods</li> <li>No perceived necessity or organizational merit</li> <li>Increased duties of doctors</li> </ul> | <ul style="list-style-type: none"> <li>Specific hospital characteristics (e.g., larger hospitals)</li> <li>Specialists for specific conditions (e.g., stroke)</li> <li>Larger volume of cardiology care (e.g., cardiac surgery and coronary artery bypass graft)</li> </ul>                                                                                | <ul style="list-style-type: none"> <li>Prescriptions for patient education program-formulated exercise</li> </ul> |

\*Hospital(s), nonspecific indicates that the study did not state the type of hospital

**Supplementary Table - Characteristics of Selected Surgical Practice Change Articles**

| Author, publication year, region | Study setting, design, and topic                                                                                                                                                                                                                | Barriers                                                                                                                                                                                                                                                                                                                                                                                                   | Facilitators                                                                                                                                                                                                                                                                                                                                          | Neutral factors                                                                                                       |
|----------------------------------|-------------------------------------------------------------------------------------------------------------------------------------------------------------------------------------------------------------------------------------------------|------------------------------------------------------------------------------------------------------------------------------------------------------------------------------------------------------------------------------------------------------------------------------------------------------------------------------------------------------------------------------------------------------------|-------------------------------------------------------------------------------------------------------------------------------------------------------------------------------------------------------------------------------------------------------------------------------------------------------------------------------------------------------|-----------------------------------------------------------------------------------------------------------------------|
| Arts-de Jong, 2015<br>Europe     | <ul style="list-style-type: none"> <li>Academic and community hospitals</li> <li>Qualitative</li> <li>Factors influencing the choice of risk-reducing salpingo-oophorectomy or risk-reducing salpingectomy with delayed oophorectomy</li> </ul> | <ul style="list-style-type: none"> <li>Perceived negative outcomes or increased risk</li> <li>Specific patient characteristics (e.g., family influence, health history)</li> <li>Complexity of decision-making or ease of deferral</li> <li>Limited knowledge and uncertainty of benefits</li> <li>Increased costs and limited hospital capacity</li> <li>Lack of cooperation between hospitals</li> </ul> | <ul style="list-style-type: none"> <li>Perceived positive outcomes and benefits</li> <li>Sufficient evidence</li> <li>Cooperation in multidisciplinary teams</li> </ul>                                                                                                                                                                               | -                                                                                                                     |
| Bailin, 2017<br>USA              | <ul style="list-style-type: none"> <li>Academic center(s)</li> <li>Observational cohort</li> <li>Predictors of urinary tract infection treatment in patients undergoing total hip or knee arthroplasties</li> </ul>                             | <ul style="list-style-type: none"> <li>Presentation of specific patient clinical conditions</li> </ul>                                                                                                                                                                                                                                                                                                     | <ul style="list-style-type: none"> <li>Existing evidence</li> <li>Presentation of past and current study results</li> </ul>                                                                                                                                                                                                                           | -                                                                                                                     |
| Barbash, 2014<br>USA             | <ul style="list-style-type: none"> <li>Regional/national</li> <li>Retrospective cohort</li> <li>Relationship between robot acquisition and volume of radical prostatectomies</li> </ul>                                                         | -                                                                                                                                                                                                                                                                                                                                                                                                          | <ul style="list-style-type: none"> <li>Competition between hospitals</li> <li>Specific hospital and population characteristics (e.g., large or teaching hospitals, more surgical specialists)</li> <li>Specific patient characteristics (e.g., private insurance)</li> </ul>                                                                          | -                                                                                                                     |
| Bekelis, 2017<br>USA             | <ul style="list-style-type: none"> <li>Regional/national</li> <li>Retrospective cohort</li> <li>Exnovation and de-adoption of carotid revascularization</li> </ul>                                                                              | <ul style="list-style-type: none"> <li>Higher shares of revenue for the practice</li> </ul>                                                                                                                                                                                                                                                                                                                | <ul style="list-style-type: none"> <li>Tenured, experienced surgical staff</li> </ul>                                                                                                                                                                                                                                                                 | -                                                                                                                     |
| Bekelis, 2014<br>USA             | <ul style="list-style-type: none"> <li>Regional/national</li> <li>Retrospective cohort</li> <li>Association of intensity of neurosurgical care with diffusion of cerebral aneurysm coiling</li> </ul>                                           | <ul style="list-style-type: none"> <li>Specific hospital characteristics (e.g., large hospital size, urban)</li> </ul>                                                                                                                                                                                                                                                                                     | <ul style="list-style-type: none"> <li>Specific patient characteristics (e.g., higher income)</li> <li>More trained surgeons</li> <li>Competition between providers, physician characteristics</li> <li>Increased volume of neurosurgical care</li> </ul>                                                                                             | -                                                                                                                     |
| Bergholm, 2014<br>Europe         | <ul style="list-style-type: none"> <li>Hospital(s), nonspecific*</li> <li>Qualitative</li> <li>New methods and technology used after dental surgery training program</li> </ul>                                                                 | <ul style="list-style-type: none"> <li>Problems with equipment</li> <li>Inexperienced/untrained personnel</li> <li>Limited time to provide treatment and information to patients</li> <li>Disappointment at unfulfilled expectations</li> <li>Insufficient scientific evidence</li> <li>Worries about safety and costs</li> </ul>                                                                          | <ul style="list-style-type: none"> <li>Interest in learning and taking initiative</li> <li>Ample preparation</li> <li>Social support/professional network</li> <li>Perception of patient benefit</li> <li>Desire to utilize expensive and extensive training</li> <li>Guilt for not using equipment</li> <li>Desire to be an early adopter</li> </ul> | -                                                                                                                     |
| Bousleiman, 2015<br>USA          | <ul style="list-style-type: none"> <li>Hospital(s), nonspecific*</li> <li>Survey</li> <li>Adoption trends of evidence-based obstetrics interventions and associated factors</li> </ul>                                                          | <ul style="list-style-type: none"> <li>Difficulty in drug delivery, cost, insurance coverage</li> </ul>                                                                                                                                                                                                                                                                                                    | <ul style="list-style-type: none"> <li>Knowledge of evidence-based practice</li> <li>Satisfaction with evidence</li> <li>Capability of implementing a change</li> </ul>                                                                                                                                                                               | -                                                                                                                     |
| Boveda, 2018<br>Europe           | <ul style="list-style-type: none"> <li>Academic and community hospitals</li> <li>Mixed methods</li> <li>Use of leadless pacemakers</li> </ul>                                                                                                   | <ul style="list-style-type: none"> <li>Limited device availability, high device cost</li> <li>Lack of reimbursement</li> <li>Lack of eligible patients</li> </ul>                                                                                                                                                                                                                                          | <ul style="list-style-type: none"> <li>New device superior to traditional pacemakers in certain scenarios</li> </ul>                                                                                                                                                                                                                                  | -                                                                                                                     |
| Boveda, 2016<br>Europe           | <ul style="list-style-type: none"> <li>Regional/national</li> <li>Survey</li> <li>Use of subcutaneous implantable cardiac defibrillator</li> </ul>                                                                                              | <ul style="list-style-type: none"> <li>Lack of availability of devices and high device cost</li> <li>Lack of reimbursement</li> <li>Lack of eligible patients</li> </ul>                                                                                                                                                                                                                                   | <ul style="list-style-type: none"> <li>Specific patient characteristics (e.g., health history, age, risk, vascularity)</li> <li>Access to newest device/technology</li> <li>Perception of reduced patient risk</li> </ul>                                                                                                                             | <ul style="list-style-type: none"> <li>Training</li> <li>Complexity of procedure</li> <li>Patients' choice</li> </ul> |

\*Hospital(s), nonspecific indicates that the study did not state the type of hospital

**Supplementary Table - Characteristics of Selected Surgical Practice Change Articles**

| Author, publication year, region | Study setting, design, and topic                                                                                                                                                                                                                             | Barriers                                                                                                                                                                                                                                                       | Facilitators                                                                                                                                                                                                                                                               | Neutral factors                                                                                                          |
|----------------------------------|--------------------------------------------------------------------------------------------------------------------------------------------------------------------------------------------------------------------------------------------------------------|----------------------------------------------------------------------------------------------------------------------------------------------------------------------------------------------------------------------------------------------------------------|----------------------------------------------------------------------------------------------------------------------------------------------------------------------------------------------------------------------------------------------------------------------------|--------------------------------------------------------------------------------------------------------------------------|
| Brindle, 2018<br>USA             | <ul style="list-style-type: none"> <li>• Hospital(s), nonspecific*</li> <li>• Qualitative</li> <li>• Factors that impact implementation of surgical debriefing</li> </ul>                                                                                    | <ul style="list-style-type: none"> <li>• Skepticism about device efficacy</li> <li>• Loss of leadership support</li> <li>• Poor communication</li> <li>• Cultural challenges</li> <li>• Lack of meaningful feedback, perceived value, and resources</li> </ul> | <ul style="list-style-type: none"> <li>• Leadership engagement and experience</li> <li>• Institutional mandates</li> <li>• Creation of culture of safety (e.g., empowerment, opportunities for feedback)</li> </ul>                                                        | -                                                                                                                        |
| Brown, 2016<br>Australia         | <ul style="list-style-type: none"> <li>• Regional/national</li> <li>• Survey</li> <li>• Knowledge, attitudes, beliefs about guidelines for adjuvant radiotherapy after radical prostatectomy (2012)</li> </ul>                                               | <ul style="list-style-type: none"> <li>• Need for individualized care</li> <li>• Perceived lack of evidence in trial data</li> <li>• Concerns about side effects, overtreatment</li> </ul>                                                                     | <ul style="list-style-type: none"> <li>• Shared-decision making</li> <li>• Multidisciplinary expertise</li> <li>• Awareness of guidelines</li> <li>• Positive attitudes toward practice</li> </ul>                                                                         | Regulatory requirements                                                                                                  |
| Brown, 2016<br>Australia         | <ul style="list-style-type: none"> <li>• Regional/national</li> <li>• Follow-up survey</li> <li>• Change in perceptions following 2012 assessment of knowledge, attitudes, beliefs about adjuvant radiotherapy after radical prostatectomy (2015)</li> </ul> | <ul style="list-style-type: none"> <li>• Continued need for individualized care</li> <li>• Continued perceived lack of evidence in trial data</li> <li>• Increased concerns about side effects</li> <li>• Fear of criticism from peers</li> </ul>              | -                                                                                                                                                                                                                                                                          | -                                                                                                                        |
| Bunta, 2016<br>USA               | <ul style="list-style-type: none"> <li>• Regional/national</li> <li>• Observational cohort</li> <li>• Effectiveness of fracture prevention program targeting osteoporosis and bone mineral density test recommendations</li> </ul>                           |                                                                                                                                                                                                                                                                | <ul style="list-style-type: none"> <li>• Systematic program design</li> <li>• Physician and patient education</li> <li>• Collaboration and mentorship</li> <li>• Robust scientific dissemination</li> <li>• Evaluations of site compliance with recommendations</li> </ul> | -                                                                                                                        |
| Callea, 2017<br>Europe           | <ul style="list-style-type: none"> <li>• Regional/national</li> <li>• Retrospective cohort</li> <li>• Diffusion of transcatheter aortic valve implantation</li> </ul>                                                                                        | <ul style="list-style-type: none"> <li>• Reimbursement through capitation</li> <li>• Publication of regional recommendations</li> <li>• Financial plan in place to manage expenditures and deficits</li> </ul>                                                 | <ul style="list-style-type: none"> <li>• Specific hospital characteristics (e.g., experience, medium to high volume, internal providers contributed to guidelines)</li> <li>• Reimbursement</li> </ul>                                                                     | -                                                                                                                        |
| Chang, 2014<br>USA               | <ul style="list-style-type: none"> <li>• Regional/national</li> <li>• Retrospective cohort</li> <li>• Impact of robot-assisted radical prostatectomy adoption on practice patterns and cost</li> </ul>                                                       | -                                                                                                                                                                                                                                                              | <ul style="list-style-type: none"> <li>• Specific hospital characteristics (e.g., teaching or urban, geographic region, high-volume surgeons)</li> </ul>                                                                                                                   | <ul style="list-style-type: none"> <li>• Specific patient characteristics (e.g., age, race, insurance status)</li> </ul> |
| Cheung, 2017<br>USA              | <ul style="list-style-type: none"> <li>• Regional/national</li> <li>• Retrospective cohort</li> <li>• Adoption pattern and decision-making of robot-assisted technology for partial nephrectomies</li> </ul>                                                 | -                                                                                                                                                                                                                                                              | <ul style="list-style-type: none"> <li>• High-volume surgeons</li> <li>• Familiarity with robotic platform</li> <li>• Shown to be effective and consistent by early adopters</li> </ul>                                                                                    | -                                                                                                                        |
| Chopra, 2016<br>Europe           | <ul style="list-style-type: none"> <li>• Hospital(s), nonspecific*</li> <li>• Survey</li> <li>• Implementation of custom software for surgical handover</li> </ul>                                                                                           | <ul style="list-style-type: none"> <li>• Unfamiliar with user interface, not user-friendly</li> <li>• Incorrect information entered</li> <li>• Perceived patient safety risks from misinformation</li> </ul>                                                   | <ul style="list-style-type: none"> <li>• Increased efficiency and patient safety</li> <li>• Lower provider burden</li> </ul>                                                                                                                                               | -                                                                                                                        |
| Choy, 2013<br>Canada             | <ul style="list-style-type: none"> <li>• Academic center(s)</li> <li>• Qualitative</li> <li>• Adoption of laparoscopic surgery at a hospital in a low-middle income country</li> </ul>                                                                       | <ul style="list-style-type: none"> <li>• Organizational structure for funding</li> <li>• Hierarchical nature of the local surgical culture</li> <li>• Need to acquire new expertise and skills associated with practice change</li> </ul>                      | -                                                                                                                                                                                                                                                                          | -                                                                                                                        |
| Compagni, 2014<br>Europe         | <ul style="list-style-type: none"> <li>• Regional/national</li> <li>• Mixed methods</li> <li>• Spread of robotic surgery and early adopters' role in diffusion</li> </ul>                                                                                    | <ul style="list-style-type: none"> <li>• Perception of practice as difficult or time consuming</li> <li>• Intraoperative complications</li> <li>• Lack of evidence of utility and patient benefit</li> </ul>                                                   | <ul style="list-style-type: none"> <li>• Surgeon characteristics (e.g., openness to innovation, desire to be early adopter, increase standing in organization)</li> </ul>                                                                                                  | -                                                                                                                        |

\*Hospital(s), nonspecific indicates that the study did not state the type of hospital

**Supplementary Table - Characteristics of Selected Surgical Practice Change Articles**

| Author, publication year, region | Study setting, design, and topic                                                                                                                                                                                            | Barriers                                                                                                                                                                                                                                                                                                                                                                                                                                                   | Facilitators                                                                                                                                                                                                                                                                                                                                                                                                | Neutral factors                                                                                                     |
|----------------------------------|-----------------------------------------------------------------------------------------------------------------------------------------------------------------------------------------------------------------------------|------------------------------------------------------------------------------------------------------------------------------------------------------------------------------------------------------------------------------------------------------------------------------------------------------------------------------------------------------------------------------------------------------------------------------------------------------------|-------------------------------------------------------------------------------------------------------------------------------------------------------------------------------------------------------------------------------------------------------------------------------------------------------------------------------------------------------------------------------------------------------------|---------------------------------------------------------------------------------------------------------------------|
|                                  |                                                                                                                                                                                                                             | <ul style="list-style-type: none"> <li>Financial constraints</li> </ul>                                                                                                                                                                                                                                                                                                                                                                                    | <ul style="list-style-type: none"> <li>Alignment with organizational culture and reputation</li> <li>Feasibility of adoption in specific fields (e.g., urology)</li> <li>Education and training opportunities</li> <li>Evidence of reproducibility of results and feasibility and safety of procedure</li> <li>Recruitment of surgeons with experience</li> <li>Pressure from patients and media</li> </ul> |                                                                                                                     |
| Cook, 2017<br>Africa             | <ul style="list-style-type: none"> <li>Hospital(s), nonspecific*</li> <li>Qualitative</li> <li>Factors affecting post-abortion care and the use of manual vacuum aspiration</li> </ul>                                      | <ul style="list-style-type: none"> <li>Unreliable supply of resources, staff shortage</li> <li>Poor care quality and inconsistent training</li> <li>Senior staff preference for old techniques</li> <li>Lack of patient feedback and performance measures</li> <li>Unclear roles and responsibilities</li> <li>Poor teamwork and power dynamics/differentials</li> <li>Differing opinions/goals on prioritization</li> <li>Cultural differences</li> </ul> | <ul style="list-style-type: none"> <li>Effective training</li> <li>Availability of ongoing educational opportunities</li> <li>Positive feelings associated with helping vulnerable population</li> <li>Cheaper and more efficient</li> <li>Positive patient outcomes</li> </ul>                                                                                                                             | -                                                                                                                   |
| Costa ML, 2016<br>Europe         | <ul style="list-style-type: none"> <li>Regional/national</li> <li>Retrospective cohort</li> <li>Effect of a clinical trial (Distal Radius Acute Fracture Fixation Trial) on clinical practice</li> </ul>                    | -                                                                                                                                                                                                                                                                                                                                                                                                                                                          | <ul style="list-style-type: none"> <li>Presentation and publication of randomized trial results in peer-reviewed journals</li> </ul>                                                                                                                                                                                                                                                                        | -                                                                                                                   |
| Cundy, 2014<br>Europe            | <ul style="list-style-type: none"> <li>Global</li> <li>Mixed methods</li> <li>Attitudes of early adopter pediatric surgeons toward robot technologies</li> </ul>                                                            | <ul style="list-style-type: none"> <li>Cost of disposable equipment and maintenance of the robot</li> <li>Instrument size</li> </ul>                                                                                                                                                                                                                                                                                                                       | <ul style="list-style-type: none"> <li>Perceived benefit and utility of instruments</li> </ul>                                                                                                                                                                                                                                                                                                              | -                                                                                                                   |
| de Groot, 2018<br>Europe         | <ul style="list-style-type: none"> <li>Academic and community hospitals</li> <li>Prospective randomized trial</li> <li>Spread of Enhanced Recovery after Surgery innovation from colorectal to gynecologic teams</li> </ul> | -                                                                                                                                                                                                                                                                                                                                                                                                                                                          | -                                                                                                                                                                                                                                                                                                                                                                                                           | <ul style="list-style-type: none"> <li>Influence from a different surgical team within the same hospital</li> </ul> |
| de Groot, 2014<br>Europe         | <ul style="list-style-type: none"> <li>Academic center(s)</li> <li>Observational cohort</li> <li>Spontaneous diffusion of Enhanced Recovery after Surgery program in gynecologic oncology surgery</li> </ul>                | <ul style="list-style-type: none"> <li>Lack of utilization of research</li> <li>Inconsistent/non-standard patient conditions that impact standard procedures</li> <li>Deep-rooted concern for inflicting patient harm</li> </ul>                                                                                                                                                                                                                           | <ul style="list-style-type: none"> <li>Active and organized implementation</li> <li>Multidisciplinary sharing of best practices</li> <li>Ease of implementation</li> <li>Positive patient outcomes</li> </ul>                                                                                                                                                                                               | -                                                                                                                   |
| Dharampal, 2016<br>Canada        | <ul style="list-style-type: none"> <li>Academic center(s)</li> <li>Qualitative</li> <li>Attitudes impacting adoption and compliance of surgical safety checklist</li> </ul>                                                 | <ul style="list-style-type: none"> <li>Evidence not equally supportive across all hospital environments</li> <li>Practice not functioning in the capacity intended</li> <li>Perceived provider burden, competing duties, change in time management</li> <li>Different perspectives based on outcome of the procedure</li> </ul>                                                                                                                            | <ul style="list-style-type: none"> <li>Similarity to current practices</li> <li>Improvements in patient safety</li> <li>Feasibility</li> <li>Perceived efficiency</li> </ul>                                                                                                                                                                                                                                | <ul style="list-style-type: none"> <li>Hospital setting</li> </ul>                                                  |
| Farges, 2014<br>Europe           | <ul style="list-style-type: none"> <li>Regional/national</li> <li>Retrospective cohort</li> </ul>                                                                                                                           | <ul style="list-style-type: none"> <li>Specific hospital and patient characteristics (e.g., female operated</li> </ul>                                                                                                                                                                                                                                                                                                                                     | <ul style="list-style-type: none"> <li>Specific hospital and patient characteristics (e.g., male patient in a</li> </ul>                                                                                                                                                                                                                                                                                    | -                                                                                                                   |

\*Hospital(s), nonspecific indicates that the study did not state the type of hospital

**Supplementary Table - Characteristics of Selected Surgical Practice Change Articles**

| Author, publication year, region | Study setting, design, and topic                                                                                                                                                                                  | Barriers                                                                                                                                                                                                                                                          | Facilitators                                                                                                                                                                                                                                                                                                                                              | Neutral factors                                                                                                                                                                                                                                                                                                 |
|----------------------------------|-------------------------------------------------------------------------------------------------------------------------------------------------------------------------------------------------------------------|-------------------------------------------------------------------------------------------------------------------------------------------------------------------------------------------------------------------------------------------------------------------|-----------------------------------------------------------------------------------------------------------------------------------------------------------------------------------------------------------------------------------------------------------------------------------------------------------------------------------------------------------|-----------------------------------------------------------------------------------------------------------------------------------------------------------------------------------------------------------------------------------------------------------------------------------------------------------------|
|                                  | <ul style="list-style-type: none"> <li>Adoption and practice of laparoscopic liver resections and open resections</li> </ul>                                                                                      | on in university hospital with large annual caseload)                                                                                                                                                                                                             | private hospital with small annual caseload)                                                                                                                                                                                                                                                                                                              |                                                                                                                                                                                                                                                                                                                 |
| Farias-Kovac, 2014 USA           | <ul style="list-style-type: none"> <li>Academic and community hospitals</li> <li>Retrospective cohort</li> <li>Impact of capitation on use of primary total hip and knee arthroplasty premium implants</li> </ul> | -                                                                                                                                                                                                                                                                 | <ul style="list-style-type: none"> <li>Pricing system with increased physician autonomy</li> <li>Patient satisfaction</li> <li>Improved outcomes</li> </ul>                                                                                                                                                                                               | <ul style="list-style-type: none"> <li>Procedure type</li> </ul>                                                                                                                                                                                                                                                |
| Gallego, 2013 Australia          | <ul style="list-style-type: none"> <li>Regional/national</li> <li>Survey</li> <li>Factors that influence uptake and diffusion of new health technologies</li> </ul>                                               | <ul style="list-style-type: none"> <li>Lack of financial resources</li> <li>Existing clinician or media bias</li> </ul>                                                                                                                                           | <ul style="list-style-type: none"> <li>Specific hospital characteristics (e.g., public hospital, regulatory approval accessible for private hospitals)</li> <li>Desire for better patient outcomes and safety</li> <li>Availability of evidence</li> <li>Cost-effective</li> </ul>                                                                        | <ul style="list-style-type: none"> <li>Peer influence</li> <li>Political considerations</li> <li>Patient demand and preferences</li> <li>Workforce capacity</li> </ul>                                                                                                                                          |
| Gams, 2017 USA                   | <ul style="list-style-type: none"> <li>Academic and community hospitals</li> <li>Mixed methods</li> <li>Barriers to implementation of delayed cord clamping as standard practice</li> </ul>                       | <ul style="list-style-type: none"> <li>Unknown criteria for patient selection</li> <li>Unfamiliarity of procedure and benefits</li> <li>Hospital policy contradicts the procedure</li> </ul>                                                                      | <ul style="list-style-type: none"> <li>Creation of hospital-based guidelines</li> <li>Institution of mandatory delivery room brief/debrief</li> <li>Mandatory online education</li> </ul>                                                                                                                                                                 | -                                                                                                                                                                                                                                                                                                               |
| Gershengorn, 2013 USA            | <ul style="list-style-type: none"> <li>Hospital(s), nonspecific*</li> <li>Retrospective cohort</li> <li>Factors associated with slower removal of technology related to pulmonary artery catheter use</li> </ul>  | -                                                                                                                                                                                                                                                                 | <ul style="list-style-type: none"> <li>Specific hospital characteristics (e.g., academic)</li> <li>Surgical intensive care units</li> <li>Surgeon leadership</li> </ul>                                                                                                                                                                                   | -                                                                                                                                                                                                                                                                                                               |
| Gillissen, 2014 Europe           | <ul style="list-style-type: none"> <li>Academic and community hospitals</li> <li>Retrospective cohort</li> <li>Sustainability of the Enhanced Recovery after Surgery program after implementation</li> </ul>      | -                                                                                                                                                                                                                                                                 | <ul style="list-style-type: none"> <li>Hospital mandate</li> </ul>                                                                                                                                                                                                                                                                                        | -                                                                                                                                                                                                                                                                                                               |
| Giusti, 2016 Europe              | <ul style="list-style-type: none"> <li>Hospital(s), nonspecific*</li> <li>Mixed methods</li> <li>Attitudes regarding surgical antibiotic prophylaxis</li> </ul>                                                   | <ul style="list-style-type: none"> <li>Provider preferences conflict with recommendations</li> <li>Patient choice deviates from guidelines</li> <li>Poor knowledge of hospital data on quality and incidence</li> <li>Overcrowded hospital environment</li> </ul> | <ul style="list-style-type: none"> <li>Guidelines shared and communicated appropriately</li> <li>Trust in group that developed policies</li> <li>Protection against litigation</li> <li>Confidence in care team</li> </ul>                                                                                                                                | <ul style="list-style-type: none"> <li>Clinical judgment of patient condition</li> <li>Specific surgeon characteristics (e.g., practice, background, and experience)</li> <li>Responsiveness to patients' needs</li> <li>Adherence to norms and ethics</li> <li>Ability to manage anxiety and stress</li> </ul> |
| Gold, 2014 USA                   | <ul style="list-style-type: none"> <li>Academic and community hospitals</li> <li>Qualitative</li> <li>Adoption and non-adoption of accelerated partial breast radiotherapy</li> </ul>                             | <ul style="list-style-type: none"> <li>Disagreement between providers about procedure</li> <li>Risk associated with early adoption</li> <li>Lack of willingness or enthusiasm to learn something new</li> <li>Lack of resources, cost</li> </ul>                  | <ul style="list-style-type: none"> <li>Encouragement and enthusiasm from colleagues</li> <li>Patient demand</li> <li>Device company interaction</li> <li>Perceived patient benefit</li> <li>Professional benefit to early adoption</li> <li>Financial incentives</li> <li>Threats to referral base</li> <li>Randomized clinical trial evidence</li> </ul> | -                                                                                                                                                                                                                                                                                                               |
| Goutte, 2016 Europe              | <ul style="list-style-type: none"> <li>Regional/national</li> <li>Retrospective cohort</li> <li>Use and outcomes of hepatobiliary laparoscopic and open left lateral sectionectomy</li> </ul>                     | -                                                                                                                                                                                                                                                                 | <ul style="list-style-type: none"> <li>Specific hospital characteristics (e.g., university, higher volume)</li> </ul>                                                                                                                                                                                                                                     | -                                                                                                                                                                                                                                                                                                               |
| Gramlich, 2017 Canada            | <ul style="list-style-type: none"> <li>Hospital(s), nonspecific*</li> <li>Mixed methods</li> </ul>                                                                                                                | <ul style="list-style-type: none"> <li>Culture of the working environment</li> </ul>                                                                                                                                                                              | <ul style="list-style-type: none"> <li>Education regarding patient benefit</li> </ul>                                                                                                                                                                                                                                                                     | -                                                                                                                                                                                                                                                                                                               |

\*Hospital(s), nonspecific indicates that the study did not state the type of hospital

**Supplementary Table - Characteristics of Selected Surgical Practice Change Articles**

| Author, publication year, region | Study setting, design, and topic                                                                                                                                                                              | Barriers                                                                                                                                                                                                                                                               | Facilitators                                                                                                                                                                                                                                                                                                                                           | Neutral factors                                                                  |
|----------------------------------|---------------------------------------------------------------------------------------------------------------------------------------------------------------------------------------------------------------|------------------------------------------------------------------------------------------------------------------------------------------------------------------------------------------------------------------------------------------------------------------------|--------------------------------------------------------------------------------------------------------------------------------------------------------------------------------------------------------------------------------------------------------------------------------------------------------------------------------------------------------|----------------------------------------------------------------------------------|
|                                  | <ul style="list-style-type: none"> <li>Barriers and facilitators to Enhanced Recovery after Surgery program implementation</li> </ul>                                                                         | <ul style="list-style-type: none"> <li>Resistance to change, long-held practices</li> </ul>                                                                                                                                                                            | <ul style="list-style-type: none"> <li>Site-specific and intervention-specific customizations</li> <li>Intervention audits</li> <li>Multidisciplinary site teams</li> </ul>                                                                                                                                                                            |                                                                                  |
| Haider, 2015 USA                 | <ul style="list-style-type: none"> <li>Academic and community hospitals</li> <li>Survey</li> <li>Battlefield innovations and impact on civilian trauma practice</li> </ul>                                    | <ul style="list-style-type: none"> <li>Lack of adequate evidence to support translation of military practices to civilian environment</li> </ul>                                                                                                                       | <ul style="list-style-type: none"> <li>Prior military experience</li> <li>Specific hospital characteristics (e.g., level 1 trauma centers)</li> </ul>                                                                                                                                                                                                  | -                                                                                |
| Hart, 2017 USA                   | <ul style="list-style-type: none"> <li>Regional/national</li> <li>Survey</li> <li>Utilization of and opinions regarding safety and efficacy of lumbar total disk replacement</li> </ul>                       | <ul style="list-style-type: none"> <li>Difficulty finding candidates</li> <li>Concerns with long-term complications</li> <li>Out-of-pocket costs for patient</li> </ul>                                                                                                | <ul style="list-style-type: none"> <li>Satisfaction with clinical results</li> <li>FDA trial involvement</li> </ul>                                                                                                                                                                                                                                    | -                                                                                |
| Herbert, 2017 Europe             | <ul style="list-style-type: none"> <li>Academic center(s)</li> <li>Qualitative</li> <li>Facilitators and challenges of implementation of the Enhanced Recovery after Surgery program</li> </ul>               | <ul style="list-style-type: none"> <li>Resistance to change</li> <li>Perceived impact on personalized patient care</li> <li>Difficulty obtaining stakeholder buy-in</li> <li>Patient and staff burden</li> <li>Disjointed approach and conflicting cultures</li> </ul> | <ul style="list-style-type: none"> <li>Alignment with evidence-based practice</li> <li>Leadership and collaboration</li> <li>Patient and staff education</li> <li>Access to resources</li> <li>Physical environment conducive to implementation</li> <li>Data collection and feedback</li> <li>Opportunities for hospital-specific adaption</li> </ul> | -                                                                                |
| Hibi, 2014 Asia                  | <ul style="list-style-type: none"> <li>Global</li> <li>Mixed methods</li> <li>Spread of lap liver resection</li> </ul>                                                                                        | <ul style="list-style-type: none"> <li>Specific hospital characteristics (e.g., less experience and lower volume)</li> </ul>                                                                                                                                           | <ul style="list-style-type: none"> <li>Specific hospital characteristics (e.g., academic or community dependent on geographic location, higher volume)</li> </ul>                                                                                                                                                                                      | -                                                                                |
| Hirshoren, 2018 Asia             | <ul style="list-style-type: none"> <li>Academic center(s)</li> <li>Retrospective cohort</li> <li>Surgical practice changes after the implementation of new American Thyroid Association guidelines</li> </ul> | -                                                                                                                                                                                                                                                                      | <ul style="list-style-type: none"> <li>Guidelines</li> </ul>                                                                                                                                                                                                                                                                                           | -                                                                                |
| Horwitz, 2013 USA                | <ul style="list-style-type: none"> <li>Regional/national</li> <li>Retrospective cohort</li> <li>Relationship between cardiac service adoption and neighboring hospitals offering the service</li> </ul>       | <ul style="list-style-type: none"> <li>Nearby competing hospitals with more advanced interventions</li> </ul>                                                                                                                                                          | <ul style="list-style-type: none"> <li>Nearby competing hospitals with similar interventions</li> </ul>                                                                                                                                                                                                                                                | -                                                                                |
| Hsu, 2016 Asia                   | <ul style="list-style-type: none"> <li>Hospital(s), nonspecific*</li> <li>Mixed methods</li> <li>Intention to use a computer-assisted orthopedic navigation surgery system</li> </ul>                         | -                                                                                                                                                                                                                                                                      | <ul style="list-style-type: none"> <li>Perceived usefulness</li> <li>Facilitating environment</li> <li>Social support</li> <li>Opportunity to stand out as professional</li> </ul>                                                                                                                                                                     | -                                                                                |
| Iacopino, 2018 Europe            | <ul style="list-style-type: none"> <li>Hospital(s), nonspecific*</li> <li>Survey</li> <li>Social influences on perceptions about a new technology</li> </ul>                                                  | <ul style="list-style-type: none"> <li>Dissimilarities in structure and social network</li> <li>Professional characteristics (e.g., same gender, tenure status, and same clinical ward)</li> </ul>                                                                     | <ul style="list-style-type: none"> <li>Connection with like-minded professionals</li> <li>Similarity in social capital characteristics and adoption behavior</li> </ul>                                                                                                                                                                                | -                                                                                |
| Jaiprakash, 2017 Australia       | <ul style="list-style-type: none"> <li>Regional/national</li> <li>Survey</li> <li>Perceptions about knee arthroscopy and willingness to adopt robotic technology</li> </ul>                                   | <ul style="list-style-type: none"> <li>Nervousness about introduction of technology</li> </ul>                                                                                                                                                                         | <ul style="list-style-type: none"> <li>Desire to shorten the learning curve</li> <li>Potential for improved efficiency</li> <li>Decreased rate of iatrogenic damage to cartilage</li> <li>Professional benefit (e.g., increase to working life, perform concurrent surgeries)</li> </ul>                                                               | <ul style="list-style-type: none"> <li>Ability to treat more patients</li> </ul> |
| Johnson, 2016 USA                | <ul style="list-style-type: none"> <li>Regional/national</li> <li>Retrospective cohort</li> </ul>                                                                                                             | <ul style="list-style-type: none"> <li>Increase in cumulative surgery rate (i.e., decrease in available patient population)</li> </ul>                                                                                                                                 | <ul style="list-style-type: none"> <li>Increasing number of Medicare centers of excellence (i.e., indication of high-quality care)</li> </ul>                                                                                                                                                                                                          | -                                                                                |

\*Hospital(s), nonspecific indicates that the study did not state the type of hospital

**Supplementary Table - Characteristics of Selected Surgical Practice Change Articles**

| Author, publication year, region | Study setting, design, and topic                                                                                                                                                                                               | Barriers                                                                                                                                                                                                                                                                              | Facilitators                                                                                                                                                                                                             | Neutral factors                                                                                                                                                 |
|----------------------------------|--------------------------------------------------------------------------------------------------------------------------------------------------------------------------------------------------------------------------------|---------------------------------------------------------------------------------------------------------------------------------------------------------------------------------------------------------------------------------------------------------------------------------------|--------------------------------------------------------------------------------------------------------------------------------------------------------------------------------------------------------------------------|-----------------------------------------------------------------------------------------------------------------------------------------------------------------|
|                                  | <ul style="list-style-type: none"> <li>Factors affecting speed of diffusion of bariatric surgery</li> </ul>                                                                                                                    | <ul style="list-style-type: none"> <li>Increase in specific patient characteristics (e.g., aged 50-59)</li> </ul>                                                                                                                                                                     |                                                                                                                                                                                                                          |                                                                                                                                                                 |
| Lamartina, 2017<br>Europe        | <ul style="list-style-type: none"> <li>Regional/national</li> <li>Prospective cohort</li> <li>Treatment of differentiated thyroid cancer patients and consistency with 2009 American Thyroid Association guidelines</li> </ul> | -                                                                                                                                                                                                                                                                                     | -                                                                                                                                                                                                                        | <ul style="list-style-type: none"> <li>Guidelines</li> <li>Specific patient characteristics (e.g., disease stage, risk)</li> <li>Evidence of benefit</li> </ul> |
| Lander, 2018<br>Canada           | <ul style="list-style-type: none"> <li>Regional/national</li> <li>Mixed methods</li> <li>Factors that contributed to the adoption of opportunistic salpingectomies</li> </ul>                                                  | -                                                                                                                                                                                                                                                                                     | <ul style="list-style-type: none"> <li>Social support and cohesion within the field</li> <li>Exposure to information regarding practice change</li> <li>Thought leader support</li> </ul>                                | -                                                                                                                                                               |
| Leggott, 2016<br>USA             | <ul style="list-style-type: none"> <li>Academic center(s)</li> <li>Mixed methods</li> <li>Rate and timing of change to peripheral nerve blocks for orthopedic procedures</li> </ul>                                            | <ul style="list-style-type: none"> <li>Adherence to group norms and prior experiences</li> <li>Resistance to change</li> <li>Lack of understanding of the technique</li> </ul>                                                                                                        | <ul style="list-style-type: none"> <li>Improved safety and efficiency</li> <li>Employment of formally trained provider</li> </ul>                                                                                        | -                                                                                                                                                               |
| Leow, 2017<br>USA                | <ul style="list-style-type: none"> <li>Regional/national</li> <li>Retrospective cohort</li> <li>Adoption of minimally invasive radical prostatectomy and outcomes</li> </ul>                                                   | <ul style="list-style-type: none"> <li>Specific hospital characteristics (e.g., military hospitals)</li> </ul>                                                                                                                                                                        | <ul style="list-style-type: none"> <li>Specific hospital characteristics (e.g., civilian hospitals, fee for service model)</li> </ul>                                                                                    | -                                                                                                                                                               |
| Ligier, 2015<br>Europe           | <ul style="list-style-type: none"> <li>Regional/national</li> <li>Observational cohort</li> <li>Impact of the dissemination of the clinical practice guidelines on management of sarcomas</li> </ul>                           | -                                                                                                                                                                                                                                                                                     | -                                                                                                                                                                                                                        | <ul style="list-style-type: none"> <li>Evidence-based guidelines on sarcoma management</li> </ul>                                                               |
| Lu, 2015<br>Asia                 | <ul style="list-style-type: none"> <li>Regional/national</li> <li>Retrospective cohort</li> <li>Characteristics of hospitals providing percutaneous coronary intervention</li> </ul>                                           | <ul style="list-style-type: none"> <li>Specific hospital characteristics (e.g., community hospital, small hospital size)</li> </ul>                                                                                                                                                   | <ul style="list-style-type: none"> <li>Specific hospital characteristics (e.g., tertiary referral center, large hospital size)</li> </ul>                                                                                | <ul style="list-style-type: none"> <li>Public or private ownership of hospital</li> </ul>                                                                       |
| Merkel, 2015<br>Europe           | <ul style="list-style-type: none"> <li>Academic and community hospitals</li> <li>Qualitative</li> <li>Implementation and diffusion of transcatheter aortic valve implementation</li> </ul>                                     | <ul style="list-style-type: none"> <li>Doubt from colleagues</li> <li>Rigorous additional training and technical difficulty</li> <li>Lack of knowledge about implant</li> <li>Views of opinion leaders in cardiac surgery</li> <li>Lack of multidisciplinary collaboration</li> </ul> | <ul style="list-style-type: none"> <li>Improved outcomes</li> <li>Positive patient feedback</li> <li>Views of opinion leaders in cardiology</li> <li>Competition among hospitals</li> </ul>                              | -                                                                                                                                                               |
| Meyer, 2013<br>USA               | <ul style="list-style-type: none"> <li>Regional/national</li> <li>Retrospective cohort</li> <li>Diffusion of sentinel lymph node biopsy</li> </ul>                                                                             | <ul style="list-style-type: none"> <li>Specific patient characteristics (e.g., race, older age, Medicaid status, and geographic region)</li> </ul>                                                                                                                                    | <ul style="list-style-type: none"> <li>Specific hospital characteristics (e.g., geographic region, larger size, quartiles, cancer center designation)</li> <li>Medical school or oncology network affiliation</li> </ul> | -                                                                                                                                                               |
| Nezhat, 2017<br>USA              | <ul style="list-style-type: none"> <li>Global</li> <li>Survey</li> <li>Practices and attitudes regarding power morcellation of presumed benign leiomyoma</li> </ul>                                                            | <ul style="list-style-type: none"> <li>FDA warning and hospital policy against procedure</li> <li>Belief that the procedure negatively affects patient outcomes</li> </ul>                                                                                                            | <ul style="list-style-type: none"> <li>Senior staff influence</li> <li>More experience with procedure</li> </ul>                                                                                                         | -                                                                                                                                                               |
| Nguyen, 2017<br>USA              | <ul style="list-style-type: none"> <li>Academic and community hospitals</li> <li>Mixed methods</li> <li>Surgical telementoring for laparoscopic sleeve gastrectomy</li> </ul>                                                  | -                                                                                                                                                                                                                                                                                     | <ul style="list-style-type: none"> <li>No complications or adverse events</li> <li>Positive impression of the program</li> <li>Perceived utility and improvement in current practice</li> </ul>                          | -                                                                                                                                                               |
| Nolan, 2017<br>USA               | <ul style="list-style-type: none"> <li>Hospital(s), nonspecific*</li> <li>Survey</li> <li>Use and role of trauma time-out protocol in improving team dynamics and care</li> </ul>                                              | -                                                                                                                                                                                                                                                                                     | <ul style="list-style-type: none"> <li>Perception of increased efficiency</li> <li>Perception of improved understanding of patient condition and procedures</li> </ul>                                                   | -                                                                                                                                                               |

\*Hospital(s), nonspecific indicates that the study did not state the type of hospital



**Supplementary Table - Characteristics of Selected Surgical Practice Change Articles**

| Author, publication year, region | Study setting, design, and topic                                                                                                                                                                                                 | Barriers                                                                                                                                                                                                                                                                                          | Facilitators                                                                                                                                                                                              | Neutral factors                                                                                               |
|----------------------------------|----------------------------------------------------------------------------------------------------------------------------------------------------------------------------------------------------------------------------------|---------------------------------------------------------------------------------------------------------------------------------------------------------------------------------------------------------------------------------------------------------------------------------------------------|-----------------------------------------------------------------------------------------------------------------------------------------------------------------------------------------------------------|---------------------------------------------------------------------------------------------------------------|
| Oberlin, 2017<br>USA             | <ul style="list-style-type: none"> <li>Academic center(s)</li> <li>Retrospective cohort</li> <li>Utilization of multiparametric MRI for diagnosis and management of prostate cancer</li> </ul>                                   | -                                                                                                                                                                                                                                                                                                 | <ul style="list-style-type: none"> <li>Need for a non-invasive and accurate screening tool</li> </ul>                                                                                                     | -                                                                                                             |
| O'Brien, 2014<br>Canada          | <ul style="list-style-type: none"> <li>Academic and community hospitals</li> <li>Qualitative</li> <li>Facilitators and barriers to the uptake of patient decision aids in breast cancer surgical consultations</li> </ul>        | <ul style="list-style-type: none"> <li>Low motivation to change communication routines</li> <li>Outcomes not compelling enough</li> <li>No perceived need for use, confident in skills</li> <li>Difficulties with information accessibility</li> <li>Outdated or incorrect information</li> </ul> | <ul style="list-style-type: none"> <li>Familiarity with change</li> <li>Effective communication skills</li> <li>Ease of tailoring to individual patients</li> <li>Accessibility</li> </ul>                | -                                                                                                             |
| Padia, 2014<br>USA               | <ul style="list-style-type: none"> <li>Community hospital(s)</li> <li>Retrospective cohort</li> <li>Adherence to guidelines for pediatric tonsillectomy recommendations</li> </ul>                                               | -                                                                                                                                                                                                                                                                                                 | -                                                                                                                                                                                                         | <ul style="list-style-type: none"> <li>Guidelines</li> <li>Contrast to routine antibiotic practice</li> </ul> |
| Parsons, 2014<br>USA             | <ul style="list-style-type: none"> <li>Regional/national</li> <li>Retrospective cohort</li> <li>Patient safety indicators of minimally invasive radical prostatectomy and open radical prostatectomy during diffusion</li> </ul> | <ul style="list-style-type: none"> <li>Specific patient characteristics (e.g., race, more comorbidities)</li> <li>Specific hospital characteristics (e.g., low-income area, non-teaching, rural)</li> </ul>                                                                                       | <ul style="list-style-type: none"> <li>Specific patient characteristics (e.g., race, fewer comorbidities)</li> <li>Specific hospital characteristics (e.g., high-income area, teaching, urban)</li> </ul> | <ul style="list-style-type: none"> <li>Specific patient characteristics (e.g., age, insurance)</li> </ul>     |
| Pollack, 2015<br>USA             | <ul style="list-style-type: none"> <li>Regional/national</li> <li>Retrospective cohort</li> <li>Peer exposure associations with adoption of a new approach to brachytherapy</li> </ul>                                           | -                                                                                                                                                                                                                                                                                                 | <ul style="list-style-type: none"> <li>Sharing patients with early adopter</li> </ul>                                                                                                                     | -                                                                                                             |
| Poon, 2013<br>USA                | <ul style="list-style-type: none"> <li>Regional/national</li> <li>Retrospective cohort</li> <li>Surgeon and practice influence on trends in nephrectomy treatment options</li> </ul>                                             | <ul style="list-style-type: none"> <li>More experienced, recertifying surgeons</li> </ul>                                                                                                                                                                                                         | <ul style="list-style-type: none"> <li>Higher volume, initially certifying urologists</li> </ul>                                                                                                          | -                                                                                                             |
| Rizan, 2017<br>Europe            | <ul style="list-style-type: none"> <li>Academic center(s)</li> <li>Prospective cohort</li> <li>Uptake of local IV-oral antibiotic prescription practice change after education</li> </ul>                                        | -                                                                                                                                                                                                                                                                                                 | -                                                                                                                                                                                                         | <ul style="list-style-type: none"> <li>Educational intervention</li> </ul>                                    |
| Roberts, 2014<br>Canada          | <ul style="list-style-type: none"> <li>Regional/national</li> <li>Survey</li> <li>Barriers to epilepsy surgery among neurologists</li> </ul>                                                                                     | <ul style="list-style-type: none"> <li>Differing perceptions of surgical candidacy</li> <li>Lack of recognition of appropriate patient clinical condition</li> <li>Inaccurate knowledge about surgery indications</li> <li>Inadequate resources</li> </ul>                                        | <ul style="list-style-type: none"> <li>Positive beliefs about capabilities</li> <li>Higher volume of patients</li> <li>More recent training</li> </ul>                                                    | -                                                                                                             |
| Rongen, 2018<br>Europe           | <ul style="list-style-type: none"> <li>Hospital(s), nonspecific*</li> <li>Retrospective cohort</li> <li>Meniscus surgeries performed after the implementation of a guideline</li> </ul>                                          | <ul style="list-style-type: none"> <li>Delay in dissemination, acceptance, and implementation of guidelines</li> </ul>                                                                                                                                                                            | <ul style="list-style-type: none"> <li>Guideline publication</li> </ul>                                                                                                                                   | -                                                                                                             |
| Sacks, 2015<br>2 or more regions | <ul style="list-style-type: none"> <li>Academic center(s)</li> <li>Retrospective cohort</li> <li>Guideline dissemination influence on use of radioactive iodine treatment</li> </ul>                                             | -                                                                                                                                                                                                                                                                                                 | <ul style="list-style-type: none"> <li>Stricter institutional guidelines</li> </ul>                                                                                                                       | -                                                                                                             |
| Sanei-Moghaddam, 2017<br>USA     | <ul style="list-style-type: none"> <li>Academic center(s)</li> <li>Mixed methods</li> <li>Factors impacting the utilization of hysterectomy clinical pathways</li> </ul>                                                         | <ul style="list-style-type: none"> <li>Perceived to be inappropriate or waste of time</li> <li>Difficulty remembering to use the pathway</li> <li>Unfavorable incentive structure</li> </ul>                                                                                                      | <ul style="list-style-type: none"> <li>Alignment with current guidelines</li> <li>Ease of use</li> </ul>                                                                                                  | -                                                                                                             |

\*Hospital(s), nonspecific indicates that the study did not state the type of hospital

**Supplementary Table - Characteristics of Selected Surgical Practice Change Articles**

| Author, publication year, region    | Study setting, design, and topic                                                                                                                                                                                       | Barriers                                                                                                                  | Facilitators                                                                                                                                                                                                       | Neutral factors                                                                                                                                                                                                                                                      |
|-------------------------------------|------------------------------------------------------------------------------------------------------------------------------------------------------------------------------------------------------------------------|---------------------------------------------------------------------------------------------------------------------------|--------------------------------------------------------------------------------------------------------------------------------------------------------------------------------------------------------------------|----------------------------------------------------------------------------------------------------------------------------------------------------------------------------------------------------------------------------------------------------------------------|
|                                     |                                                                                                                                                                                                                        | <ul style="list-style-type: none"> <li>• Bureaucracy associated with change</li> </ul>                                    |                                                                                                                                                                                                                    |                                                                                                                                                                                                                                                                      |
| Sartelli, 2017<br>2 or more regions | <ul style="list-style-type: none"> <li>• Global</li> <li>• Survey</li> <li>• Structure and resources of antimicrobial stewardship teams in surgical departments</li> </ul>                                             | -                                                                                                                         | <ul style="list-style-type: none"> <li>• Tailored to local clinical practice</li> <li>• Collaboration between healthcare professionals</li> </ul>                                                                  | -                                                                                                                                                                                                                                                                    |
| Savin, 2016<br>2 or more regions    | <ul style="list-style-type: none"> <li>• Global</li> <li>• Survey</li> <li>• Use of reverse total shoulder arthroplasty in acute complex proximal humerus fractures</li> </ul>                                         | <ul style="list-style-type: none"> <li>• Experience and familiarity with older treatments</li> </ul>                      | <ul style="list-style-type: none"> <li>• Evidence</li> <li>• Working at academic center</li> <li>• More recent training/fellowship</li> </ul>                                                                      | -                                                                                                                                                                                                                                                                    |
| Schootman, 2016<br>USA              | <ul style="list-style-type: none"> <li>• Regional/national</li> <li>• Observational cohort</li> <li>• Acquisition of robotic systems and characteristics of patients receiving robot assisted surgery</li> </ul>       | <ul style="list-style-type: none"> <li>• Specific hospital characteristics (e.g., rural)</li> </ul>                       | <ul style="list-style-type: none"> <li>• Specific hospital characteristics (e.g., teaching hospitals, high volume, advanced imaging or oncology services)</li> </ul>                                               | <ul style="list-style-type: none"> <li>• Implementation of electronic medical record</li> <li>• Distance to nearest hospital offering robot assisted surgery</li> <li>• Specific patient characteristics (e.g., race, sex, insurance type, median income)</li> </ul> |
| Schroeck, 2014<br>USA               | <ul style="list-style-type: none"> <li>• Regional/national</li> <li>• Retrospective cohort</li> <li>• Technological capacity association with prostate cancer quality of care</li> </ul>                               | <ul style="list-style-type: none"> <li>• Specific patient population (e.g., race, higher stage, comorbidities)</li> </ul> | <ul style="list-style-type: none"> <li>• Specific patient characteristics (e.g., older, lower socioeconomic status)</li> <li>• Increased technological capacity</li> </ul>                                         | -                                                                                                                                                                                                                                                                    |
| Schroeck, 2013<br>USA               | <ul style="list-style-type: none"> <li>• Regional/national</li> <li>• Retrospective cohort</li> <li>• Technological capacity association with receipt of localized prostate cancer therapy</li> </ul>                  | -                                                                                                                         | -                                                                                                                                                                                                                  | <ul style="list-style-type: none"> <li>• Technological capacity</li> </ul>                                                                                                                                                                                           |
| Schulman, 2017<br>USA               | <ul style="list-style-type: none"> <li>• Regional/national</li> <li>• Retrospective cohort</li> <li>• Re-excision rates after initial breast conserving surgery after guideline publication</li> </ul>                 | -                                                                                                                         | <ul style="list-style-type: none"> <li>• 100% of practice dedicated to breast surgery</li> </ul>                                                                                                                   | -                                                                                                                                                                                                                                                                    |
| Sears, 2017<br>USA                  | <ul style="list-style-type: none"> <li>• Regional/national</li> <li>• Survey</li> <li>• Carpal tunnel release provider requests for electrodiagnostic studies and other diagnostics tests</li> </ul>                   | -                                                                                                                         | <ul style="list-style-type: none"> <li>• Provider specialty (e.g., neurosurgery)</li> </ul>                                                                                                                        | <ul style="list-style-type: none"> <li>• Membership in professional organization</li> <li>• Size of practice</li> <li>• Teaching facility status</li> </ul>                                                                                                          |
| Sethi, 2013<br>USA                  | <ul style="list-style-type: none"> <li>• Regional/national</li> <li>• Retrospective cohort</li> <li>• Early adoption of endovascular aneurysm repair and outcomes of abdominal aortic aneurysm repairs</li> </ul>      | -                                                                                                                         | <ul style="list-style-type: none"> <li>• More competition</li> </ul>                                                                                                                                               | -                                                                                                                                                                                                                                                                    |
| Shigeta, 2017<br>Asia               | <ul style="list-style-type: none"> <li>• Regional/national</li> <li>• Retrospective cohort</li> <li>• Effect of practice guidelines for endometrial cancer on clinical practice and outcomes</li> </ul>                | -                                                                                                                         | <ul style="list-style-type: none"> <li>• Guidelines</li> </ul>                                                                                                                                                     | -                                                                                                                                                                                                                                                                    |
| Shinn, 2014<br>USA                  | <ul style="list-style-type: none"> <li>• Hospital(s), nonspecific*</li> <li>• Mixed methods</li> <li>• Effect of star physicians and star hospitals on the diffusion of laparoscopic gastric bypass surgery</li> </ul> | -                                                                                                                         | <ul style="list-style-type: none"> <li>• Star physicians (i.e., graduated or completed residency at a Top 30 hospital)</li> <li>• Star hospitals (i.e., certified by the Council of Teaching Hospitals)</li> </ul> | -                                                                                                                                                                                                                                                                    |
| Simons, 2017<br>USA                 | <ul style="list-style-type: none"> <li>• Regional/national</li> <li>• Retrospective cohort</li> <li>• Patterns of fenestrated endovascular aneurysm repair device adoption at physician/hospital level</li> </ul>      | -                                                                                                                         | -                                                                                                                                                                                                                  | <ul style="list-style-type: none"> <li>• Training and knowledge of device</li> </ul>                                                                                                                                                                                 |

\*Hospital(s), nonspecific indicates that the study did not state the type of hospital

**Supplementary Table - Characteristics of Selected Surgical Practice Change Articles**

| Author, publication year, region      | Study setting, design, and topic                                                                                                                                                                                            | Barriers                                                                                                                                                                                                                                                                                                                                                                                                     | Facilitators                                                                                                                                                                                                                                                                          | Neutral factors                                                                                                                                                                                                                                                                                                                           |
|---------------------------------------|-----------------------------------------------------------------------------------------------------------------------------------------------------------------------------------------------------------------------------|--------------------------------------------------------------------------------------------------------------------------------------------------------------------------------------------------------------------------------------------------------------------------------------------------------------------------------------------------------------------------------------------------------------|---------------------------------------------------------------------------------------------------------------------------------------------------------------------------------------------------------------------------------------------------------------------------------------|-------------------------------------------------------------------------------------------------------------------------------------------------------------------------------------------------------------------------------------------------------------------------------------------------------------------------------------------|
| Simunovic, 2013<br>Canada             | <ul style="list-style-type: none"> <li>Hospital(s), nonspecific*</li> <li>Mixed methods</li> <li>Uptake of total mesorectal excision by rectal cancer surgeons</li> </ul>                                                   | <ul style="list-style-type: none"> <li>Lack of perceived advantage over old techniques</li> </ul>                                                                                                                                                                                                                                                                                                            | <ul style="list-style-type: none"> <li>Perceived advantage for new surgical technique</li> </ul>                                                                                                                                                                                      | <ul style="list-style-type: none"> <li>Specific surgeon characteristics (e.g. graduation year, weekly operating room hours, surgery volume, attendance of scientific conferences)</li> </ul>                                                                                                                                              |
| Sinha, 2015<br>Asia                   | <ul style="list-style-type: none"> <li>Regional/national</li> <li>Qualitative</li> <li>Perceptions and practices of registered health care providers vs. traditional care providers</li> </ul>                              | <ul style="list-style-type: none"> <li>Cultural differences among providers</li> <li>Lack of local evidence</li> <li>Systematic burden, shortage of skilled professionals</li> </ul>                                                                                                                                                                                                                         | <ul style="list-style-type: none"> <li>Perceived patient benefits regarding prevention</li> </ul>                                                                                                                                                                                     | -                                                                                                                                                                                                                                                                                                                                         |
| Sivarajan, 2015<br>USA                | <ul style="list-style-type: none"> <li>Regional/national</li> <li>Retrospective cohort</li> <li>Acquisition of the surgical robot and impact on partial nephrectomy</li> </ul>                                              | -                                                                                                                                                                                                                                                                                                                                                                                                            | <ul style="list-style-type: none"> <li>Acquisition of robot</li> </ul>                                                                                                                                                                                                                | -                                                                                                                                                                                                                                                                                                                                         |
| Slusher, 2014<br>USA                  | <ul style="list-style-type: none"> <li>Academic center(s)</li> <li>Observational cohort</li> <li>Adherence to guidelines for standard treatment of perforated appendicitis and outcomes</li> </ul>                          | -                                                                                                                                                                                                                                                                                                                                                                                                            | <ul style="list-style-type: none"> <li>Education</li> <li>Policy change</li> <li>Multidisciplinary approach</li> </ul>                                                                                                                                                                | -                                                                                                                                                                                                                                                                                                                                         |
| Spellman, 2013<br>USA                 | <ul style="list-style-type: none"> <li>Academic and community hospitals</li> <li>Qualitative</li> <li>Perceptions of factors related to the transition and integration of decision aid into routine medical care</li> </ul> | <ul style="list-style-type: none"> <li>Perception of practice as time intensive and challenging</li> <li>Patient choice contradicts practice</li> <li>Disagreement between providers</li> <li>Poor provider-to-patient communication skills</li> </ul>                                                                                                                                                       | <ul style="list-style-type: none"> <li>Perception of patient benefits regarding decision-making and risk communication</li> </ul>                                                                                                                                                     | -                                                                                                                                                                                                                                                                                                                                         |
| Sullivan, 2017<br>Canada              | <ul style="list-style-type: none"> <li>Hospital(s), nonspecific*</li> <li>Mixed methods</li> <li>Barriers and facilitators to the utilization of research evidence in pediatric surgical practice</li> </ul>                | <ul style="list-style-type: none"> <li>Shortage of properly trained personnel, outdated equipment, and a lack of funding</li> <li>Time constraints/competing tasks</li> <li>Poor quality of evidence</li> <li>Lack of confidence in personal skill in implementing practices</li> <li>Implementation not a priority in clinical practice</li> <li>Peer pressure</li> <li>Small patient population</li> </ul> | <ul style="list-style-type: none"> <li>More experience</li> <li>Working with groups dedicated to implementation or junior staff</li> <li>Working at research institution, active researcher</li> <li>Access to evidence</li> <li>Professional obligation to best practices</li> </ul> | <ul style="list-style-type: none"> <li>Personal expectation and intention to implement</li> <li>Existing confidence and comfort in implementation</li> <li>Prior beliefs that positive outcomes and best practices are associated with implementation</li> <li>Emotional influence</li> <li>Positive or negative reinforcement</li> </ul> |
| Tan, 2015<br>USA                      | <ul style="list-style-type: none"> <li>Regional/national</li> <li>Retrospective cohort</li> <li>Relationship between an oncology network and the utilization of laparoscopy and partial nephrectomy</li> </ul>              | -                                                                                                                                                                                                                                                                                                                                                                                                            | <ul style="list-style-type: none"> <li>Specific hospital characteristics (e.g., non-community hospitals, designated cancer center)</li> <li>Specific patient characteristics (e.g., age, gender, socioeconomic status, and comorbidities)</li> </ul>                                  | <ul style="list-style-type: none"> <li>Treatment within or by oncology network affiliated hospitals and physicians</li> </ul>                                                                                                                                                                                                             |
| Torbica, 2017<br>Europe               | <ul style="list-style-type: none"> <li>Regional/national</li> <li>Retrospective cohort</li> <li>Factors that influence diffusion of medical technology</li> </ul>                                                           | -                                                                                                                                                                                                                                                                                                                                                                                                            | <ul style="list-style-type: none"> <li>Specific patient characteristics (e.g., age, higher education)</li> </ul>                                                                                                                                                                      | <ul style="list-style-type: none"> <li>Regional per capita GDP</li> <li>Number of implanting centers</li> </ul>                                                                                                                                                                                                                           |
| Trevisonno, 2015<br>2 or more regions | <ul style="list-style-type: none"> <li>Regional/national</li> <li>Survey</li> <li>Practice patterns of laparoscopic inguinal hernia repair, barriers to adoption, and educational needs</li> </ul>                          | <ul style="list-style-type: none"> <li>Perceived minimal benefits</li> <li>Lack of training</li> <li>Increased resource requirements</li> <li>Increase in complications</li> <li>Conflicts with current practices</li> </ul>                                                                                                                                                                                 | -                                                                                                                                                                                                                                                                                     | -                                                                                                                                                                                                                                                                                                                                         |
| Trinh, 2015<br>Asia                   | <ul style="list-style-type: none"> <li>Community hospital(s)</li> <li>Survey</li> <li>Knowledge of, attitudes towards and experience of episiotomy use</li> </ul>                                                           | <ul style="list-style-type: none"> <li>Poor outcomes</li> <li>Lack of training</li> <li>Existing attitudes and beliefs that the harms outweigh the benefits</li> </ul>                                                                                                                                                                                                                                       | <ul style="list-style-type: none"> <li>Specific patient characteristics (e.g., nulliparous versus multiparous)</li> <li>Belief that volume of procedures is already too high</li> </ul>                                                                                               | -                                                                                                                                                                                                                                                                                                                                         |

\*Hospital(s), nonspecific indicates that the study did not state the type of hospital

**Supplementary Table - Characteristics of Selected Surgical Practice Change Articles**

| Author, publication year, region    | Study setting, design, and topic                                                                                                                                                                              | Barriers                                                                                                                                                                                                                                              | Facilitators                                                                                                                                                                                                          | Neutral factors                                                                        |
|-------------------------------------|---------------------------------------------------------------------------------------------------------------------------------------------------------------------------------------------------------------|-------------------------------------------------------------------------------------------------------------------------------------------------------------------------------------------------------------------------------------------------------|-----------------------------------------------------------------------------------------------------------------------------------------------------------------------------------------------------------------------|----------------------------------------------------------------------------------------|
|                                     |                                                                                                                                                                                                               | <ul style="list-style-type: none"> <li>• Social pressure to conform to peers</li> </ul>                                                                                                                                                               | <ul style="list-style-type: none"> <li>• Knowledge and training regarding when to perform the procedure</li> </ul>                                                                                                    |                                                                                        |
| Urquhart, 2015<br>Canada            | <ul style="list-style-type: none"> <li>• Regional/national</li> <li>• Qualitative</li> <li>• System-level factors important to synoptic reporting tools</li> </ul>                                            | <ul style="list-style-type: none"> <li>• Disorganized healthcare system structure and Information Technology infrastructure</li> <li>• Differing policies and procedures across hospitals</li> <li>• Resistance to working collaboratively</li> </ul> | <ul style="list-style-type: none"> <li>• Effective healthcare delivery system</li> <li>• Organized Information Technology infrastructure</li> <li>• Policy environment</li> <li>• History of collaboration</li> </ul> | -                                                                                      |
| Vertullo, 2017<br>2 or more regions | <ul style="list-style-type: none"> <li>• Global</li> <li>• Survey</li> <li>• Attitudes toward change in total knee replacement</li> </ul>                                                                     | <ul style="list-style-type: none"> <li>• Institutional or systemic limitations</li> <li>• Belief that risks outweigh the benefits</li> <li>• Learning curve</li> </ul>                                                                                | -                                                                                                                                                                                                                     | <ul style="list-style-type: none"> <li>• Surgeon relationship with industry</li> </ul> |
| Wang, 2015<br>USA                   | <ul style="list-style-type: none"> <li>• Regional/national</li> <li>• Survey</li> <li>• Use of decision aids for prostate cancer treatment and barriers to adoption</li> </ul>                                | <ul style="list-style-type: none"> <li>• Perception that ability superseded the decision aid</li> <li>• Concern about patient accessibility to information</li> <li>• Doubt about improvement in decision-making</li> </ul>                           | -                                                                                                                                                                                                                     | -                                                                                      |
| Wasterlain, 2017<br>USA             | <ul style="list-style-type: none"> <li>• Regional/national</li> <li>• Survey</li> <li>• Perspectives on cost containment strategies regarding the use of novel implants</li> </ul>                            | -                                                                                                                                                                                                                                                     | <ul style="list-style-type: none"> <li>• Evidence for clinical outcomes and cost-benefit analyses</li> <li>• New technology</li> <li>• Applying trial/monitoring periods</li> </ul>                                   | <ul style="list-style-type: none"> <li>• Patient involvement</li> </ul>                |
| Woldrich, 2013<br>USA               | <ul style="list-style-type: none"> <li>• Regional/national</li> <li>• Retrospective cohort</li> <li>• Utilization of extirpative and ablative treatments for localized renal masses</li> </ul>                | <ul style="list-style-type: none"> <li>• Specific patient clinical conditions (e.g. chronic kidney disease)</li> </ul>                                                                                                                                | <ul style="list-style-type: none"> <li>• Specific hospital characteristics (e.g., teaching or urban)</li> <li>• Specific patient clinical conditions (e.g., diabetes, hypertension)</li> </ul>                        | <ul style="list-style-type: none"> <li>• Geographic region</li> </ul>                  |
| Wright, 2016<br>USA                 | <ul style="list-style-type: none"> <li>• Hospital(s), nonspecific*</li> <li>• Retrospective cohort</li> <li>• Use of robotic-assisted surgery</li> </ul>                                                      | <ul style="list-style-type: none"> <li>• Less market competition</li> </ul>                                                                                                                                                                           | <ul style="list-style-type: none"> <li>• Specific patient characteristics (e.g., age)</li> <li>• More market competition</li> </ul>                                                                                   | <ul style="list-style-type: none"> <li>• Hospital financial status</li> </ul>          |
| Yu, 2017<br>Asia                    | <ul style="list-style-type: none"> <li>• Academic center(s)</li> <li>• Survey</li> <li>• Impact of changes to the surgical safety checklist</li> </ul>                                                        | -                                                                                                                                                                                                                                                     | <ul style="list-style-type: none"> <li>• Revisions based on feedback</li> </ul>                                                                                                                                       | -                                                                                      |
| Zhang, 2014<br>USA                  | <ul style="list-style-type: none"> <li>• Regional/national</li> <li>• Retrospective cohort</li> <li>• Relationship between managed-care penetration and the dissemination of robotic prostatectomy</li> </ul> | <ul style="list-style-type: none"> <li>• Efforts to reduce utilization and spending</li> </ul>                                                                                                                                                        | <ul style="list-style-type: none"> <li>• Specific population characteristics (e.g., more racial diversity, education and wealth, population densities)</li> </ul>                                                     | <ul style="list-style-type: none"> <li>• Managed-care penetration</li> </ul>           |

\*Hospital(s), nonspecific indicates that the study did not state the type of hospital
